# Supplementary material for: Optical Configuration Effect on the Structure and Reactivity of Diastereomers Revealed by Spin Effects and Molecular Dynamics Calculations
Source: MDPI journal article supplement (doi:10.3390/ijms23010038), 2021-12-21
Supplement: s1 [file s1]

## SUPPLEMENTARY MATERIALS

### Optical configuration effect on the structure and reactivity of diastereomers revealed by spin effects and molecular dynamics calculations

Aleksandra A. Ageeva<sup>1,2</sup>, Alexander B. Doktorov<sup>1,\*</sup>, Olga Yu. Selyutina<sup>1</sup>, Ilya M. Magin<sup>1,2</sup>, Margarita G. Ilyina<sup>3</sup>, Sophia S. Borisevich<sup>3,4</sup>, Ruslan Yu. Rubtsov<sup>4</sup>, Sergey L. Khursan<sup>3</sup>, Alexander A. Stepanov<sup>1</sup>, Sergey F. Vasilevsky<sup>1</sup>, Nikolay E. Polyakov<sup>1,2</sup>, Tatyana V. Leshina<sup>1</sup>

<sup>1</sup> Voevodsky Institute of Chemical Kinetics and Combustion, 630090 Novosibirsk, Russia;

<sup>2</sup> Department of Natural Sciences, Novosibirsk State University, 630090 Novosibirsk, Russia;

<sup>3</sup> Ufa Institute of Chemistry, Ufa Federal Research Centre of the Russian Academy of Sciences, 450054 Ufa, Russia;

<sup>4</sup> The Institute of Problems of Chemical Physics of the Russian Academy of Sciences, 142432 Chernogolovka, Russia.

\*corresponding author: doktorov@kinetics.nsc.ru

#### 1. Photoinduced processes in dyads.

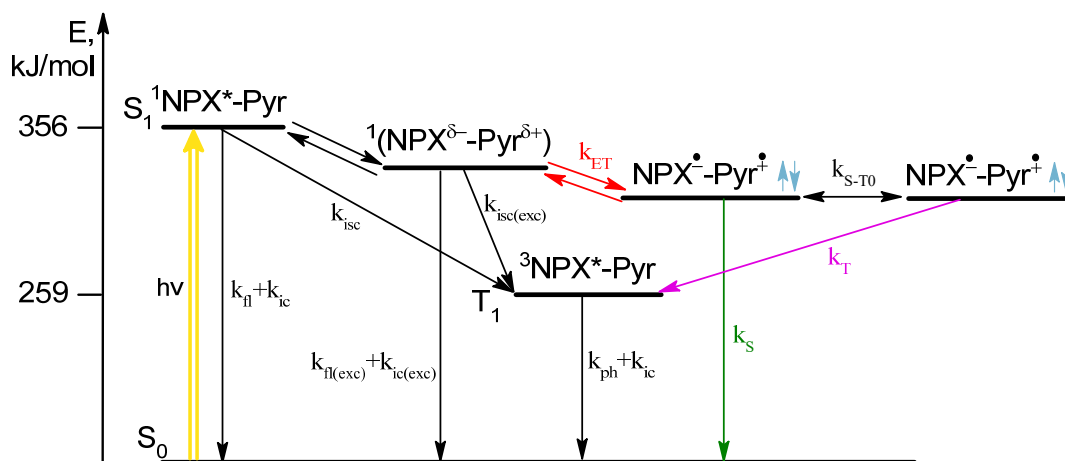

**Scheme S1.** Photoinduced processes in systems where NPX enantiomers are linked with (S)-N-methylpyrrolidin. Upon photoexcitation, the singlet local excited state (LE) is formed, and then LE converts to an exciplex (partial charge transfer), in which electron transfer (ET) can occur, followed by the formation of a biradical-zwitterion (BZ). The back electron transfer can occur from triplet ( $k_T$ ) and singlet ( $k_S$ ) collective spin states of BZ. From experimental data  $k_S$  was shown to be higher than  $k_T$ . Subscripts denote fl – fluorescence, ic – internal conversion, isc – intersystem crossing, ph – phosphorescence, exc – exciplex, S-T<sub>0</sub> – intersystem crossing in BZ.

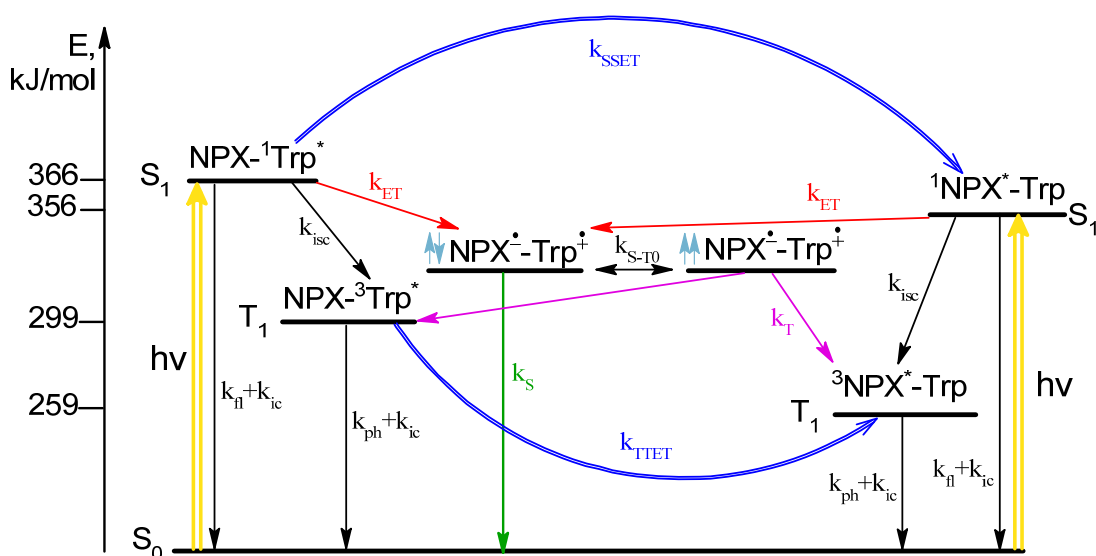

**Scheme S2.** Photoinduced processes in NPX-Trp dyad. The fraction of light absorbed by aminoacid and drug molecules depends on excitation wavelength, in CIDNP experiments  $\lambda_{exc}=308$  nm and all light is absorbed by NPX (97%), at  $\lambda_{exc}=300$  nm in fluorescence experiments 40% of light is absorbed by Trp and 60% by NPX. Upon photoexcitation the singlet excited state of chromophore is formed, then electron transfer may occur both from Trp in ground state to  $^1\text{NPX}^*$  in singlet excited state and from singlet excited state of  $^1\text{Trp}^*$  to NPX in ground state resulted in formation of BZ. From experimental data, the rate of back electron transfer from triplet collective spin state ( $k_T$ ) of BZ was established to be higher than from singlet ( $k_S$ ). In addition, the singlet  $^1\text{Trp}^*$  and triplet  $^3\text{Trp}^*$  excited states are quenched *via* singlet-singlet (SSET) and triplet-triplet energy transfer (TTET), correspondingly. In essence, photoinduced processes related with CIDNP is limited by the right part of scheme that describes  $^1\text{NPX}^*$  quenching.

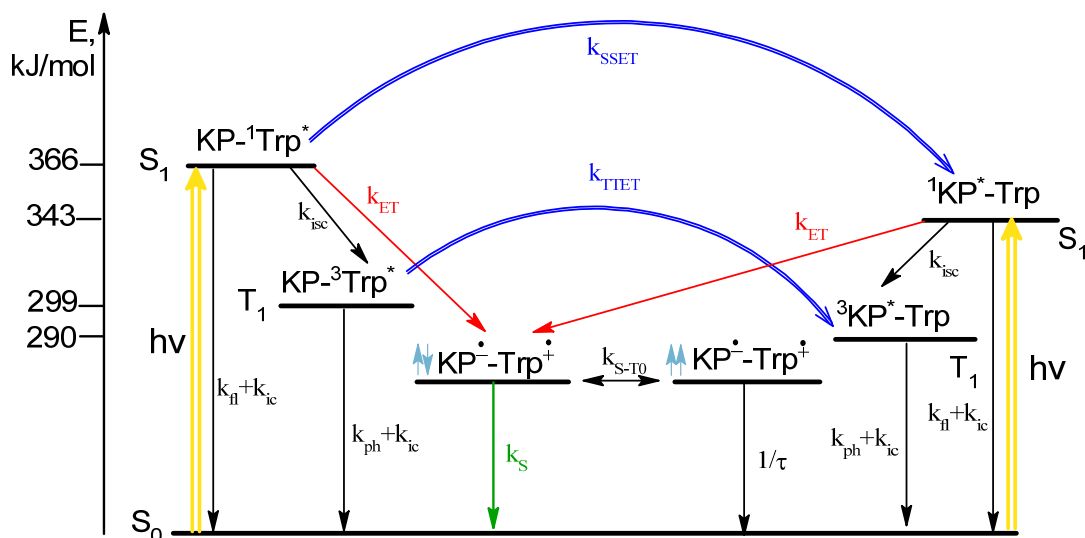

**Scheme S3.** Photoinduced processes in the KP-Trp dyad. The fraction of light absorbed at  $\lambda_{exc}=308$  nm is 55/45 KP/Trp, at  $\lambda_{exc}=280$  nm 65/35 KP/Trp. This scheme is similar to the NPX-Trp case,

the difference is that back ET is allowed only from the singlet spin state of BZ. Experimental data showed that CIDNP effects are formed as a result of ET from excited singlet state of  $^1\text{Trp}^*$  to KP in ground state. As appears from above, when discussing the CIDNP effects, only the left part of photoinduced processes should be considered. Energy of singlet and triplet excited states of KP are taken from Lhiaubet, V., Gutierrez, F., Penaud-Berruyer, F., Amouyal, E., Daudey, J.-P., Poteau, R., ... Paillous, N. (2000). Spectroscopic and theoretical studies of the excited states of fenofibric acid and ketoprofen in relation with their photosensitizing properties. *New Journal of Chemistry*, 24(6), 403–410. Musa, K. A. K., Matxain, J. M., & Eriksson, L. A. (2007). Mechanism of Photoinduced Decomposition of Ketoprofen. *Journal of Medicinal Chemistry*, 50(8), 1735–1743.

## 2. Calculation of CIDNP in the frame of $S-T_0$ approximation.

**Table S1.** Calculated values of CIDNP effects on protons of dyad I and II. Calculation parameters  $\Delta g = 6 \times 10^{-4}$ ; magnetic field 47000 G; diffusion coefficient  $D = 10^{-6} \text{ cm}^2/\text{s}$ ; Onsager radius 15 Å, contact radius 7 Å,  $\tau$  – lifetime of BZ. Values of corresponding HFI constants are following:

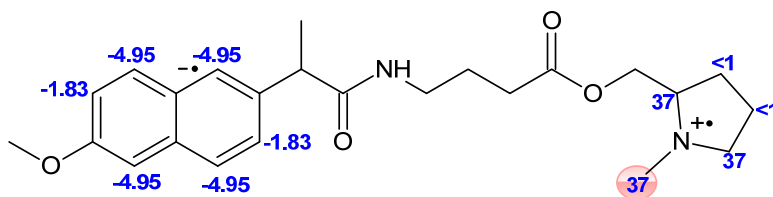

| $\tau$ (ns) | CIDNP of aromatic protons        | CIDNP of N-CH <sub>3</sub>                 |
|-------------|----------------------------------|--------------------------------------------|
|             | 4 nuclei ( $a = -4.95\text{G}$ ) | 3 nuclei ( $a_{\text{eff}} = 37\text{G}$ ) |
| 7           | -0.0051                          | -0.0067                                    |
| 9           | -0.0048                          | -0.0057                                    |
| 14          | -0.0039                          | -0.0039                                    |
| 20          | -0.0032                          | -0.0030                                    |
| 35          | -0.0020                          | -0.0016                                    |
| 70          | -0.0012                          | -0.0009                                    |

**Table S2.** Calculated values of CIDNP effects on protons of dyad III. Calculation parameters  $\Delta g = 4 \times 10^{-4}$ ; magnetic field 47000 G; diffusion coefficient  $D = 10^{-6} \text{ cm}^2/\text{s}$ ; Onsager radius 15 Å, contact radius 7 Å,  $\tau$  – lifetime of BZ. Values of corresponding HFI constants are following:

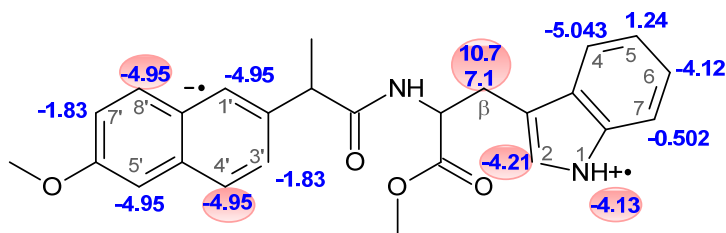

| $\tau$<br>(ns) | Aromatic protons<br>of NPX                            | Protons of Trp moiety                                                                       |                            |                            |                            |                            |
|----------------|-------------------------------------------------------|---------------------------------------------------------------------------------------------|----------------------------|----------------------------|----------------------------|----------------------------|
|                | 1', 4', 8', 5'<br>( $a = -4.95\text{G}$ )<br>4 nuclei | $\beta\text{-CH}_2$ average for 2<br>nuclei ( $a_1 = 10.7\text{G}$<br>$a_2 = 7.1\text{G}$ ) | 2-CH<br>( $a = -4.2$<br>G) | 1-NH<br>( $a = -4.1$<br>G) | 4-CH<br>( $a = -5.0$<br>G) | 6-CH<br>( $a = -4.1$<br>G) |
| 7              | -0.0201                                               | -0.0100                                                                                     | 0.0041                     | 0.0039                     | 0.0050                     | 0.0039                     |
| 10             | -0.0188                                               | -0.0094                                                                                     | 0.0038                     | 0.0036                     | 0.0047                     | 0.0036                     |
| 14             | -0.0167                                               | -0.0084                                                                                     | 0.0033                     | 0.0031                     | 0.0041                     | 0.0032                     |
| 20             | -0.0135                                               | -0.0068                                                                                     | 0.0027                     | 0.0025                     | 0.0034                     | 0.0025                     |
| 35             | -0.0096                                               | -0.0049                                                                                     | 0.0019                     | 0.0017                     | 0.0024                     | 0.0017                     |
| 50             | -0.0070                                               | -0.0036                                                                                     | 0.0014                     | 0.0013                     | 0.0018                     | 0.0013                     |
| 100            | -0.0038                                               | -0.0019                                                                                     | 0.0007                     | 0.0007                     | 0.0009                     | 0.0007                     |

**Table S3.** Calculated values of CIDNP effects on protons of dyad IV. Calculation parameters  $\Delta g = 6 \times 10^{-4}$ ; magnetic field 47000 G; diffusion coefficient  $D = 10^{-6} \text{ cm}^2/\text{s}$ ; Onsager radius 15 Å, contact radius 7 Å,  $\tau$  – lifetime of BZ. Values of corresponding HFI constants are following:

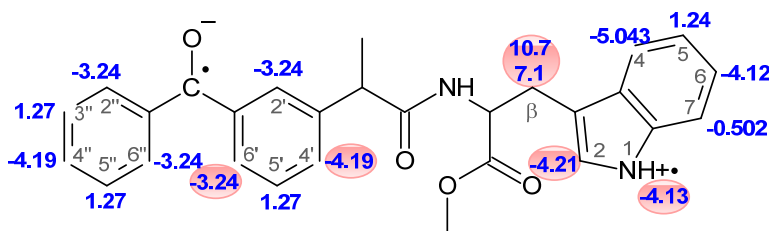

| $\tau$<br>(ns) | Aromatic protons of<br>KP                          |                                        | Protons of Trp moiety                                                                       |                    |                    |                    |                    |
|----------------|----------------------------------------------------|----------------------------------------|---------------------------------------------------------------------------------------------|--------------------|--------------------|--------------------|--------------------|
|                | 2', 6', 2'',<br>6''<br>( $a = -3.24$ )<br>4 nuclei | 4', 4''<br>( $a = -4.19$ )<br>2 nuclei | $\beta\text{-CH}_2$ average for 2<br>nuclei ( $a_1 = 10.7\text{G}$<br>$a_2 = 7.1\text{G}$ ) | 2CH ( $a = -4.2$ ) | 1NH ( $a = -4.1$ ) | 4CH ( $a = -5.0$ ) | 6CH ( $a = -4.1$ ) |
| 7              | 0.0074                                             | 0.0050                                 | 0.0055                                                                                      | -0.0025            | -0.0024            | -0.0031            | -0.0024            |
| 10             | 0.0073                                             | 0.0050                                 | 0.0054                                                                                      | -0.0025            | -0.0024            | -0.0031            | -0.0024            |
| 14             | 0.0068                                             | 0.0047                                 | 0.0051                                                                                      | -0.0024            | -0.0023            | -0.0029            | -0.0023            |
| 20             | 0.0061                                             | 0.0042                                 | 0.0046                                                                                      | -0.0021            | -0.0020            | -0.0026            | -0.0020            |
| 35             | 0.0046                                             | 0.0032                                 | 0.0035                                                                                      | -0.0016            | -0.0016            | -0.0020            | -0.0016            |
| 70             | 0.0031                                             | 0.0021                                 | 0.0023                                                                                      | -0.0011            | -0.0010            | -0.0013            | -0.0010            |
| 100            | 0.0022                                             | 0.0015                                 | 0.0017                                                                                      | -0.0008            | -0.0007            | -0.0010            | -0.0007            |

### 3. Calculation of CIDNP in dyads within the two-position model.

To elucidate the influence of the magnetic dipole-dipole interaction on the magnitude of the stationary nuclear polarization within the framework of the two-position model, solutions of the equations for the elements of the stationary density matrix are found, which describe quantum transitions between the singlet and triplet spin states under the action of spin interactions. These interactions are: the Zeeman interaction of the electrons of the dyad with an external strong magnetic field, HFI and magnetic dipole-dipole interaction of electrons. A model is considered in which there are two nuclei, each of which interacts with an electron 1 and 2 with HFI constants  $a_1$  and  $a_2$ , respectively. The Zeeman interaction of nuclei with an external magnetic field was neglected. Introducing basis functions (1),

$$\begin{aligned} S\alpha_{N1}\alpha_{N2} &= 1, S\alpha_{N1}\beta_{N2} = 2, S\beta_{N1}\alpha_{N2} = 3, S\beta_{N1}\beta_{N2} = 4 \\ T_0\alpha_{N1}\alpha_{N2} &= 5, T_0\alpha_{N1}\beta_{N2} = 6, T_0\beta_{N1}\alpha_{N2} = 7, T_0\beta_{N1}\beta_{N2} = 8 \end{aligned} \quad (1)$$

we have equations for the density matrix for transitions between states 1 and 5 (2).

$$\begin{aligned} -\frac{1}{4} &= -i(H_{15}\rho_{51}^{(1)} - \rho_{15}^{(1)}H_{51}) - k_S\rho_{11}^{(1)} - \frac{1}{\tau_1}\rho_{11}^{(1)} + \frac{1}{\tau_2}\rho_{11}^{(2)} \\ 0 &= -i(H_{15}\rho_{51}^{(2)} - \rho_{15}^{(2)}H_{51}) - \frac{1}{\tau_2}\rho_{11}^{(2)} + \frac{1}{\tau_1}\rho_{11}^{(1)} \\ 0 &= -i(H_{55}^{(1)}\rho_{51}^{(1)} + H_{51}\rho_{11}^{(1)} - \rho_{55}^{(1)}H_{51}) - \frac{k_S + k_T}{2}\rho_{51}^{(1)} - \frac{1}{\tau_1}\rho_{51}^{(1)} + \frac{1}{\tau_2}\rho_{51}^{(2)} \\ 0 &= -i(H_{55}^{(2)}\rho_{51}^{(2)} + H_{51}\rho_{11}^{(2)} - \rho_{55}^{(2)}H_{51}) - \frac{1}{\tau_2}\rho_{51}^{(2)} + \frac{1}{\tau_1}\rho_{51}^{(1)} \\ 0 &= -i(H_{15}\rho_{55}^{(1)} - \rho_{11}^{(1)}H_{15} - \rho_{15}^{(1)}H_{55}^{(1)}) - \frac{k_S + k_T}{2}\rho_{15}^{(1)} - \frac{1}{\tau_1}\rho_{15}^{(1)} + \frac{1}{\tau_2}\rho_{15}^{(2)} \\ 0 &= -i(H_{15}\rho_{55}^{(2)} - \rho_{11}^{(2)}H_{15} - \rho_{15}^{(2)}H_{55}^{(2)}) - \frac{1}{\tau_2}\rho_{15}^{(2)} + \frac{1}{\tau_1}\rho_{15}^{(1)} \\ 0 &= -i(H_{51}\rho_{15}^{(1)} - \rho_{51}^{(1)}H_{15}) - k_T\rho_{55}^{(1)} - \frac{1}{\tau_1}\rho_{55}^{(1)} + \frac{1}{\tau_2}\rho_{55}^{(2)} \\ 0 &= -i(H_{51}\rho_{15}^{(2)} - \rho_{51}^{(2)}H_{15}) - \frac{1}{\tau_2}\rho_{55}^{(2)} + \frac{1}{\tau_1}\rho_{55}^{(1)} \end{aligned} \quad (2)$$

Here, the superscripts indicate the corresponding position,  $\tau_1$  and  $\tau_2$  the times the dyad is in a given configuration (a given position within a two-position model). The following values are also introduced:

$k_S$  - the rate of transformation of the biradical in the singlet state,

$$k_T = k_{T'} + k_p + \frac{1}{T_1} \equiv k_{T'} + \frac{1}{T} \quad \left( \frac{1}{T} = k_p + \frac{1}{T'} \right) - \text{triplet transformation rate,}$$

$k_{T'}$  - triplet transformation rate contributing to the desired polarization,

$k_p$  - the rate of formation of a product from a triplet that does not contribute to the desired polarization,

$T'$  - triplet state relaxation time,

$\frac{1}{T}$  - the total transformation rate of the triplet that does not contribute to the desired polarization.

It is believed that the creation of a dyad and recombination (electron transfer (forward and backward)) is carried out only from the first (contact) position. From the second position, these processes are absent. The values of the diagonal values of the Hamiltonian associated with the magnetic dipole-dipole interaction are different in different positions, and the off-diagonal elements responsible for the internal interactions of the radicals of the dyad are assumed to be the same. It is enough to consider the solution of this system. The solution of other necessary systems is obtained by replacing indices 1 by 2 and 5 by 6, indices 1 by 3 and 5 by 7, indices 1 by 4 and 5 by 8.

The CIDNP on the first nucleus is:

$$P_1 = \frac{\Pi_1}{\omega_1} = k_s (\rho_{11}^{(1)} + \rho_{22}^{(1)} - \rho_{33}^{(1)} - \rho_{44}^{(1)}) + k'_T (\rho_{55}^{(1)} + \rho_{66}^{(1)} - \rho_{77}^{(1)} - \rho_{88}^{(1)}), \quad (3)$$

Systems of type (2) include all elements of the singlet and triplet spin states for various nuclear configurations. From these systems, by adding the first, second, seventh and eighth equations, it follows:

$$\begin{aligned} \frac{1}{4} - \frac{1}{T} \rho_{55}^{(1)} &= k_s \rho_{11}^{(1)} + k'_T \rho_{55}^{(1)}, & \frac{1}{4} - \frac{1}{T} \rho_{66}^{(1)} &= k_s \rho_{22}^{(1)} + k'_T \rho_{66}^{(1)}, \\ \frac{1}{4} - \frac{1}{T} \rho_{77}^{(1)} &= k_s \rho_{33}^{(1)} + k'_T \rho_{77}^{(1)}, & \frac{1}{4} - \frac{1}{T} \rho_{88}^{(1)} &= k_s \rho_{44}^{(1)} + k'_T \rho_{88}^{(1)}. \end{aligned} \quad (4)$$

Then from (3) and (4) we have, respectively:

$$P_1 = \frac{\Pi_1}{\omega_1} = -\frac{1}{T} (\rho_{55}^{(1)} + \rho_{66}^{(1)} - \rho_{77}^{(1)} - \rho_{88}^{(1)}), \quad P_2 = \frac{\Pi_2}{\omega_2} = -\frac{1}{T} (\rho_{55}^{(1)} + \rho_{77}^{(1)} - \rho_{66}^{(1)} - \rho_{88}^{(1)}), \quad (5)$$

That is, polarization is expressed in terms of triplet populations and is proportional to relaxation from these states.

Introducing the notation

$$\frac{\omega_1 - \omega_2}{2} = \delta; \quad \frac{a_1 - a_2}{4} = a_-; \quad \frac{a_1 + a_2}{4} = a_+ \quad (6)$$

for the matrix elements of the spin Hamiltonian, we have

$$\begin{aligned} H_{55}^{(k)} &= H_{66}^{(k)} = H_{77}^{(k)} = H_{88}^{(k)} = -A^{(k)} \quad (k=1,2), \\ H_{15} &= H_{51} = \delta + a_- \quad H_{26} = H_{62} = \delta + a_+ \quad H_{37} = H_{73} = \delta - a_+ \quad H_{48} = H_{84} = \delta - a_-. \end{aligned} \quad (7)$$

In our consideration, for simplicity, we will take  $a_1 = a_2 = 2a$  and

$$a_- = 0, \quad a_+ = a, \quad H_{15} = H_{48} = \delta, \quad H_{26} = \delta + a, \quad H_{37} = \delta - a \quad (8)$$

Since all diagonal elements of the spin Hamiltonian in each position are the same, then  $\rho_{55}^{(1)} = \rho_{88}^{(1)}$  and from (5) we also have

$$P_1 = -P_2 = -\frac{1}{T}(\rho_{66}^{(1)} - \rho_{77}^{(1)}). \quad (9)$$

Let us introduce the notation:

$$K = \frac{k_s + k_T}{2}, \quad \Delta = \frac{2\delta a}{\delta^2 + a^2} \quad \left( a = \frac{a_1}{2} = \frac{a_2}{2}, \quad \delta = \frac{\omega_1 - \omega_2}{2} \right) \quad (10)$$

and dimensionless parameters:

$$Z_0 = \frac{4K(\delta^2 + a^2) \left[ (A_1 - A_2)^2 \tau_1^{-1} + K \left( K \tau_1^{-1} + (\tau_1^{-1} + \tau_2^{-1})^2 + A_2^2 \right) \right]}{k_s k_T \left[ (K \tau_2^{-1} - A_1 A_2)^2 + (A_2 (K + \tau_1^{-1}) + A_1 \tau_2^{-1})^2 \right]}$$

$$Z_1 = \frac{4K(\delta^2 + a^2)}{(A_1 - A_2)^2 \tau_1^{-1} + K \left( K \tau_1^{-1} + (\tau_1^{-1} + \tau_2^{-1})^2 + A_2^2 \right)}$$

$$Z_2 = \frac{4(\delta^2 + a^2) (A_1^2 + K(K + \tau_1^{-1}))}{(K \tau_2^{-1} - A_1 A_2)^2 + (A_2 (K + \tau_1^{-1}) + A_1 \tau_2^{-1})^2}$$

(11)

As a result of solving systems of equations of the form (2) from (9), we obtain

$$P_1 = -P_2 = -\frac{Z_0 \Delta}{4KT} \left\{ \frac{1 + 2Z_1 + Z_1 Z_2 (1 - \Delta^2)}{1 + 2(Z_0 + Z_2) + 2Z_0 Z_1 (1 + \Delta^2) + (1 - \Delta^2) \left[ (Z_2 + Z_0 (1 + Z_1))^2 - Z_0^2 Z_1^2 \Delta^2 \right]} \right\}$$

(12)

Note that at, expression (12) is greatly simplified

$$P_1 = -P_2 = -\frac{Z_0 \Delta}{4KT \left( (1 + Z_0)^2 - Z_0^2 \Delta^2 \right)}$$

(13)

and does not depend on the parameter  $Z_1 = Z_2$ . That is why, in the absence of motion ( $\tau_1 = \tau_2 = \infty$ ), when it follows from (11)

$$Z_0 = Z = \frac{4K^2(\delta^2 + a^2)}{k_s k_r (A_1^2 + K^2)}, \quad Z_1 = Z_2 = \frac{4(\delta^2 + a^2)}{A_2^2},$$

(14)

we have the same result (15):

$$P_1 = -P_2 = -\frac{Z\Delta}{4KT\left((1+Z)^2 - Z^2\Delta^2\right)},$$

(15)

which, of course, does not depend on the magnitude of the magnetic dipole-dipole interaction  $A_2$  in the second position.

#### 4. Quantum-chemical calculations

Molecular structure of R-S-isomer KP-Trp in Cartesian coordinates (x, y, z)

| Atom | x             | y            | z            |
|------|---------------|--------------|--------------|
| 6    | -8.396421738  | -7.832925603 | 10.030711657 |
| 6    | -7.138866093  | -8.245199401 | 9.603940949  |
| 6    | -6.107866250  | -8.293266295 | 10.533949270 |
| 6    | -6.314684973  | -7.900581151 | 11.850470673 |
| 6    | -7.539234304  | -7.386283736 | 12.231032223 |
| 6    | -8.586748116  | -7.357058669 | 11.314539011 |
| 6    | -6.876552979  | -8.435388929 | 8.133342934  |
| 6    | -6.849503347  | -7.092325936 | 7.378056108  |
| 8    | -6.931060236  | -7.053581815 | 6.163185989  |
| 7    | -6.687024028  | -5.968483560 | 8.118150608  |
| 6    | -8.126823114  | -4.319036418 | 6.943614547  |
| 6    | -9.189344091  | -4.266522842 | 7.986888542  |
| 7    | -10.940064142 | -4.844203416 | 9.274155895  |
| 6    | -10.025752205 | -5.280792517 | 8.345204699  |
| 6    | -9.590954784  | -3.126096346 | 8.760476955  |
| 6    | -10.685570198 | -3.526592283 | 9.555689652  |
| 6    | -11.334052913 | -2.646042205 | 10.416299785 |
| 6    | -10.868337152 | -1.350699829 | 10.473253150 |
| 6    | -9.782150215  | -0.930318999 | 9.689686482  |
| 6    | -9.144815294  | -1.803801731 | 8.834474465  |
| 6    | -6.725232314  | -4.671016003 | 7.491800667  |
| 6    | -6.291747714  | -3.628466539 | 8.495012436  |
| 6    | -9.857926439  | -6.635186811 | 11.607772561 |
| 8    | -10.945097773 | -7.090015365 | 11.317262887 |
| 8    | -6.197901363  | -3.797171383 | 9.683697365  |
| 8    | -6.032088652  | -2.469328375 | 7.885634862  |
| 6    | -5.612689520  | -1.411385878 | 8.749992568  |
| 6    | -9.685466120  | -5.275241889 | 12.187063387 |
| 6    | -8.602411535  | -4.491725772 | 11.794395572 |
| 6    | -8.456796400  | -3.208906478 | 12.286473222 |
| 6    | -9.375359310  | -2.714411921 | 13.198812680 |
| 6    | -10.459369248 | -3.488792669 | 13.590382517 |
| 6    | -10.628074565 | -4.761039247 | 13.069923165 |
| 6    | -7.855256330  | -9.381093367 | 7.441548383  |
| 1    | -9.225837389  | -7.794156640 | 9.342390985  |
| 1    | -5.121898768  | -8.609151059 | 10.219712428 |

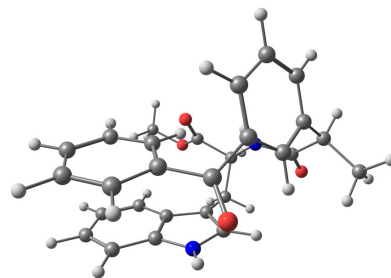



|   |               |               |              |
|---|---------------|---------------|--------------|
| 1 | -5.500959673  | -7.942952649  | 12.559861957 |
| 1 | -7.680722380  | -6.990861679  | 13.226623523 |
| 1 | -5.868960556  | -8.838667680  | 8.009791889  |
| 1 | -6.682647542  | -5.999212718  | 9.124655722  |
| 1 | -8.358186765  | -5.075153718  | 6.197426334  |
| 1 | -8.052171393  | -3.360880946  | 6.429648876  |
| 1 | -11.550388142 | -5.447938275  | 9.802130146  |
| 1 | -10.079270198 | -6.280328591  | 7.950797633  |
| 1 | -12.175584162 | -2.964214888  | 11.013666744 |
| 1 | -11.355489787 | -0.642514420  | 11.127874471 |
| 1 | -9.457008776  | 0.099016663   | 9.743482070  |
| 1 | -8.337466970  | -1.465854415  | 8.200365447  |
| 1 | -6.028119485  | -4.652758071  | 6.654823704  |
| 1 | -6.388949954  | -1.197317070  | 9.481158586  |
| 1 | -5.440896527  | -0.556084305  | 8.106149610  |
| 1 | -4.698941791  | -1.693730706  | 9.266559284  |
| 1 | -7.885395236  | -4.858171834  | 11.076319159 |
| 1 | -7.631985656  | -2.605298647  | 11.944977681 |
| 1 | -9.259871730  | -1.713778725  | 13.590824065 |
| 1 | -11.177235292 | -3.094989338  | 14.295513800 |
| 1 | -11.475775653 | -5.370277877  | 13.350037833 |
| 1 | -8.877353288  | -9.013423032  | 7.512340477  |
| 1 | -7.603681696  | -9.461776798  | 6.388299657  |
| 1 | -7.812954984  | -10.365326719 | 7.903655774  |

Molecular structure of S-R-isomer KP-Trp in Cartesian coordinates (x, y, z)

| Atom | x            | y           | z            |
|------|--------------|-------------|--------------|
| 6    | 17.036736983 | 7.254249675 | 8.702071484  |
| 6    | 16.142455923 | 7.675447786 | 7.723986121  |
| 6    | 16.653893740 | 8.162303232 | 6.527833674  |
| 6    | 18.022646357 | 8.189950577 | 6.294150254  |
| 6    | 18.891640994 | 7.662047439 | 7.229198061  |
| 6    | 18.394117217 | 7.196034954 | 8.443661726  |
| 6    | 14.669191256 | 7.417818919 | 7.897244896  |
| 6    | 14.325267142 | 5.922341691 | 7.767965744  |
| 8    | 13.241717420 | 5.496907574 | 8.127963479  |
| 7    | 15.258971821 | 5.116507374 | 7.207283808  |
| 6    | 15.069677292 | 3.004101658 | 8.499884797  |
| 6    | 16.369171274 | 3.143275310 | 9.214982140  |
| 7    | 17.943362198 | 3.870975746 | 10.646826411 |
| 6    | 16.692582391 | 4.103378317 | 10.126629682 |
| 6    | 17.501475700 | 2.266061102 | 9.140659103  |
| 6    | 18.468121052 | 2.755873826 | 10.044320898 |
| 6    | 19.692321846 | 2.120983502 | 10.230532631 |
| 6    | 19.938218433 | 0.980309041 | 9.498316975  |
| 6    | 18.988268412 | 0.472567141 | 8.598779222  |
| 6    | 17.775614453 | 1.102434978 | 8.416884763  |
| 6    | 15.036936433 | 3.695424454 | 7.118139539  |
| 6    | 16.083364225 | 3.090137667 | 6.214198810  |
| 6    | 19.253203037 | 6.434818000 | 9.397516296  |
| 8    | 19.210950653 | 6.614764812 | 10.597589294 |
| 8    | 17.089495440 | 3.640520916 | 5.845887476  |
| 8    | 15.751325077 | 1.841563092 | 5.879531647  |
| 6    | 16.683665555 | 1.172200216 | 5.028610074  |
| 6    | 20.082531792 | 5.365668541 | 8.774676273  |
| 6    | 19.578473807 | 4.652021292 | 7.688830144  |
| 6    | 20.306938731 | 3.616215888 | 7.136935650  |
| 6    | 21.559588315 | 3.311501712 | 7.643464361  |
| 6    | 22.067156480 | 4.017270963 | 8.725730895  |
| 6    | 21.322239898 | 5.029374114 | 9.307577803  |
| 6    | 14.090628611 | 7.947204723 | 9.207517182  |
| 1    | 16.679958538 | 6.879919047 | 9.648658281  |
| 1    | 15.974699999 | 8.493224050 | 5.753845559  |

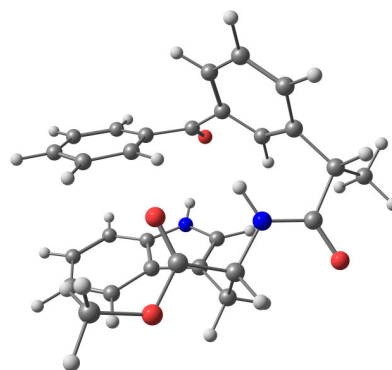

|   |              |              |              |
|---|--------------|--------------|--------------|
| 1 | 18.401616909 | 8.569504749  | 5.356631301  |
| 1 | 19.948743577 | 7.591706060  | 7.015238144  |
| 1 | 14.134579722 | 7.893148619  | 7.072207049  |
| 1 | 16.167203267 | 5.464412680  | 6.944322651  |
| 1 | 14.828495431 | 1.951826167  | 8.350896835  |
| 1 | 14.263621693 | 3.447374436  | 9.079696743  |
| 1 | 18.461757489 | 4.532187889  | 11.204081510 |
| 1 | 16.086867979 | 4.912221243  | 10.496287033 |
| 1 | 20.421032661 | 2.505310813  | 10.928933874 |
| 1 | 20.877739667 | 0.463006468  | 9.625901893  |
| 1 | 19.205222756 | -0.437030404 | 8.057463588  |
| 1 | 17.032551115 | 0.688145679  | 7.750403755  |
| 1 | 14.056512741 | 3.510672072  | 6.680899208  |
| 1 | 16.787760728 | 1.713712842  | 4.092081424  |
| 1 | 17.652965901 | 1.104519036  | 5.516874464  |
| 1 | 16.268427222 | 0.185624533  | 4.856545902  |
| 1 | 18.601019846 | 4.872319412  | 7.288534775  |
| 1 | 19.884963767 | 3.056418220  | 6.319629484  |
| 1 | 22.136569026 | 2.509045981  | 7.207437167  |
| 1 | 23.041677949 | 3.770733687  | 9.121494338  |
| 1 | 21.694805659 | 5.574946301  | 10.163161108 |
| 1 | 14.576537122 | 7.489274605  | 10.067198699 |
| 1 | 14.230644953 | 9.024271727  | 9.270075909  |
| 1 | 13.031799692 | 7.713072511  | 9.259641966  |

Molecular structure of S-S-isomer KP-Trp in cartesian coordinates \$(x, y, z)\$

| Atom | x             | y             | z            |
|------|---------------|---------------|--------------|
| 6    | -11.164795021 | -13.934432543 | 9.438498124  |
| 6    | -10.003829522 | -14.599284590 | 9.826917109  |
| 6    | -10.049800211 | -15.388795221 | 10.968765667 |
| 6    | -11.222616884 | -15.507854666 | 11.706715115 |
| 6    | -12.378930713 | -14.887700111 | 11.277174335 |
| 6    | -12.362707509 | -14.117006027 | 10.116344902 |
| 6    | -8.772276045  | -14.549471408 | 8.953028578  |
| 6    | -8.868766210  | -15.450844277 | 7.709211143  |
| 8    | -7.984390650  | -15.473341046 | 6.877361854  |
| 7    | -9.968245613  | -16.244983903 | 7.619554824  |
| 6    | -11.383769484 | -17.983499311 | 6.683191629  |
| 6    | -12.608241473 | -17.346430397 | 7.257616177  |
| 7    | -14.094839018 | -16.538587465 | 8.734938454  |
| 6    | -12.893819770 | -17.191219154 | 8.584389122  |
| 6    | -13.689798849 | -16.732929231 | 6.538334982  |
| 6    | -14.594537028 | -16.231654704 | 7.495227609  |
| 6    | -15.734706798 | -15.513684607 | 7.138409803  |
| 6    | -15.960177087 | -15.313563866 | 5.795746194  |
| 6    | -15.083053911 | -15.824424137 | 4.822940511  |
| 6    | -13.957179479 | -16.531756828 | 5.180281298  |
| 6    | -10.247708904 | -16.978976819 | 6.419529321  |
| 6    | -10.593230822 | -16.056830719 | 5.258693972  |
| 6    | -13.678356043 | -13.594544778 | 9.624371998  |
| 8    | -14.648359095 | -13.656562971 | 10.357015458 |
| 8    | -10.789799298 | -14.874655578 | 5.322898389  |
| 8    | -10.647689415 | -16.759549420 | 4.119880792  |
| 6    | -10.913285410 | -15.991562660 | 2.946863207  |
| 6    | -13.836579068 | -13.063981331 | 8.240353684  |
| 6    | -13.104567733 | -13.520188214 | 7.145525140  |
| 6    | -13.396732517 | -13.068488955 | 5.869906275  |
| 6    | -14.431684165 | -12.170036475 | 5.674733113  |
| 6    | -15.183879256 | -11.730098849 | 6.755719620  |
| 6    | -14.888949045 | -12.175381513 | 8.029658083  |
| 6    | -8.379293768  | -13.141893205 | 8.504329313  |
| 1    | -11.128059250 | -13.282442957 | 8.582647065  |
| 1    | -9.162186295  | -15.918990908 | 11.287375933 |

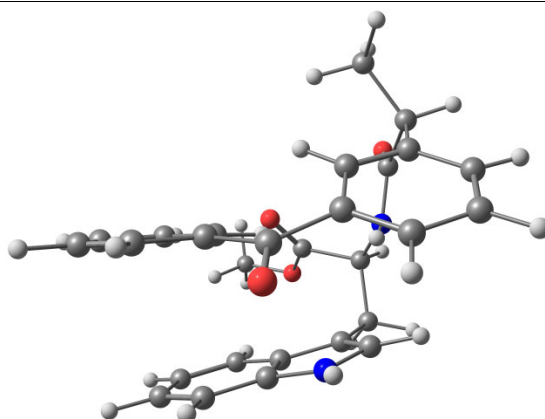

|   |               |               |              |  |
|---|---------------|---------------|--------------|--|
| 1 | -11.232413406 | -16.105082921 | 12.607238520 |  |
| 1 | -13.306849511 | -14.987335563 | 11.820245907 |  |
| 1 | -7.936730855  | -14.967586681 | 9.517291602  |  |
| 1 | -10.759525021 | -16.038208388 | 8.206792710  |  |
| 1 | -11.000936784 | -18.732920733 | 7.374128466  |  |
| 1 | -11.618131445 | -18.488365459 | 5.748137393  |  |
| 1 | -14.473996779 | -16.207256257 | 9.606181209  |  |
| 1 | -12.333561514 | -17.512200720 | 9.447415759  |  |
| 1 | -16.395311680 | -15.104998487 | 7.889168929  |  |
| 1 | -16.824892022 | -14.746415718 | 5.484339963  |  |
| 1 | -15.299826813 | -15.657577563 | 3.777755209  |  |
| 1 | -13.287835191 | -16.926519326 | 4.428222835  |  |
| 1 | -9.351440032  | -17.515601204 | 6.113843077  |  |
| 1 | -10.152988531 | -15.224843888 | 2.823955242  |  |
| 1 | -10.889856233 | -16.692641039 | 2.120504227  |  |
| 1 | -11.889168597 | -15.516541321 | 3.022654564  |  |
| 1 | -12.334469012 | -14.266584213 | 7.250832491  |  |
| 1 | -12.817032698 | -13.444153210 | 5.040977024  |  |
| 1 | -14.659776473 | -11.816944878 | 4.679173277  |  |
| 1 | -15.995904700 | -11.033907970 | 6.603035138  |  |
| 1 | -15.472288310 | -11.853291441 | 8.878495361  |  |
| 1 | -9.149030664  | -12.696858755 | 7.876697770  |  |
| 1 | -8.221461305  | -12.501310805 | 9.369742354  |  |
| 1 | -7.465337438  | -13.193776788 | 7.920110077  |  |
